# Supplementary material
Source: Elsevier journal article supplement (https://univ-rennes.hal.science/hal-01290500v1/file/mmc1.pdf)
Supplement: mmc1 [file mmc1.pdf]

Supplemental Table 1. Primers used in the present study

| Primers          | Sequences 5' → 3'        | T <sub>m</sub> °C |
|------------------|--------------------------|-------------------|
| <i>sbsLepr1</i>  | CACCTTCAACCCACCTCACT     | 60                |
| <i>sbsLepr2</i>  | TCCCTCTCCTCCATCACATC     | 60                |
| <i>sbsLepr3</i>  | TCCTTCATGTGCTCAGTTGC     | 60                |
| <i>sbsLepr4</i>  | AGGACCAGGGTGACAAACAG     | 60                |
| <i>sbsLepr5</i>  | CCACACCTCAGAACAGCAGA     | 60                |
| <i>sbsLepr6</i>  | TCACACCTGGGGTTTGCTG      | 60                |
| <i>sbsLepr7</i>  | AGTGAGGTGGGTGAAGGTGAGT   | 70                |
| <i>sbsLepr8</i>  | TCCCTCTCCTCCATCACATC     | 60                |
| <i>sbsLepr9</i>  | GAAACCAAACCCTCCAGTCA     | 60                |
| <i>sbsLepr10</i> | TATCTCAGCGGGCCAGTATC     | 60                |
| <i>sbsExon11</i> | ACGGGCTTCAGTGTGAGTTTC    | 60                |
| <i>sbsExon15</i> | AGGACCAGGGTGACAAACAG     | 60                |
| <i>FwdSKL</i>    | GCCGCTCTAGAAGTAGTGGAATCC | 72                |
| <i>Fwdsbs18S</i> | TCAAGAACGAAAGTC          | 58                |
| <i>Rvsbs18S</i>  | GGACATCTAAGGGCATCACA     | 58                |
